# Supplementary material for: Efficient spatial charge separation in unique 2D tandem heterojunction CdxZn1−xIn2S4–CdS–MoS2 rendering highly-promoted visible-light-induced H2 generation
Source: Royal Society of Chemistry journal article supplement (doi:10.1039/d0ta10564c), 2020-12-10
Supplement: d0ta10564c1.pdf [file d0ta10564c1.pdf]

## Electronic supplementary information (ESI)

### Efficient spatial charge separation in unique 2D tandem heterojunction $\text{Cd}_x\text{Zn}_{1-x}\text{In}_2\text{S}_4\text{-CdS-MoS}_2$ rendering highly-promoted visible-light-induced $\text{H}_2$ generation

Jiakun Wu,<sup>†a</sup> Bowen Sun,<sup>†a</sup> Hui Wang,<sup>c</sup> Yanyan Li,<sup>a</sup> Ying Zuo,<sup>d</sup> Wenjing Wang,<sup>a</sup>  
Haifeng Lin,<sup>\*a</sup> Shaoxiang Li<sup>b</sup> and Lei Wang<sup>\*ab</sup>

<sup>a</sup> Key Laboratory of Eco-chemical Engineering, Key Laboratory of Optic-electric Sensing and Analytical Chemistry of Life Science, Taishan Scholar Advantage and Characteristic Discipline Team of Eco-Chemical Process and Technology, College of Chemistry and Molecular Engineering, Qingdao University of Science and Technology, Qingdao 266042, P. R. China. E-mail: hflin20088@126.com

<sup>b</sup> Shandong Engineering Research Center for Marine Environment Corrosion and Safety Protection, College of Environment and Safety Engineering, Qingdao University of Science and Technology, Qingdao 266042, P. R. China. E-mail: inorchemwl@126.com

<sup>c</sup> Key Laboratory of Rubber-Plastics of Ministry of Education, School of Polymer Science and Engineering, Qingdao University of Science and Technology, Qingdao 266042, P. R. China.

<sup>d</sup> Scientific Instrument Center, Shanxi University, Taiyuan 030006, P. R. China.

<sup>†</sup> Equal contribution to this work.

### Characterization Results

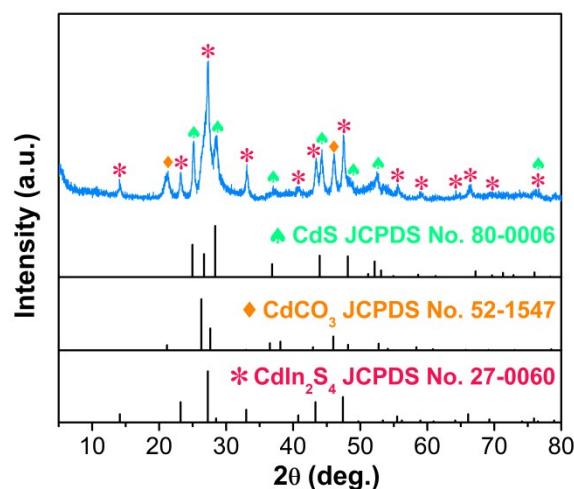

Fig. S1 XRD pattern of  $\text{CdIn}_2\text{S}_4$  nanosheets.

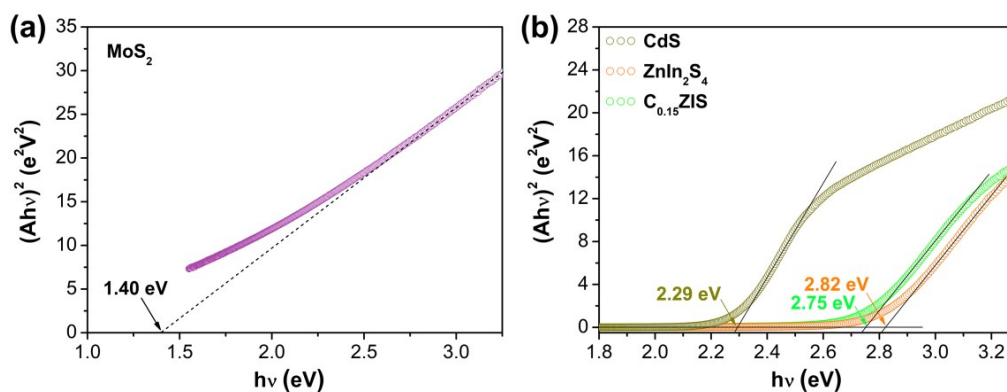

**Fig. S2** Determined bandgaps of (a) MoS<sub>2</sub> and (b) CdS, ZnIn<sub>2</sub>S<sub>4</sub>, and C<sub>0.15</sub>ZIS.

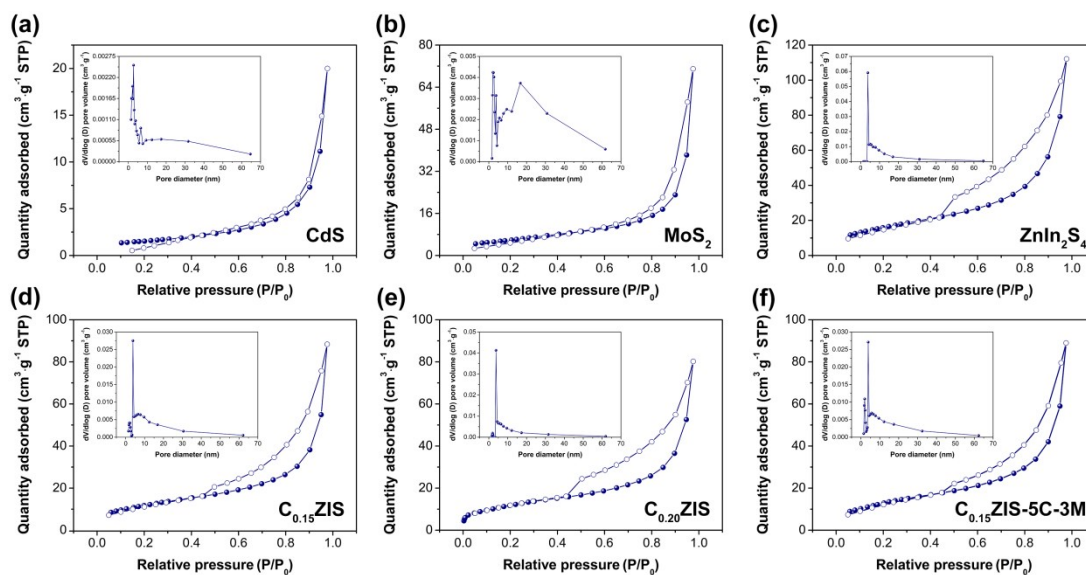

**Fig. S3** N<sub>2</sub> adsorption-desorption isotherms and corresponding pore-size distributions of (a) CdS, (b) MoS<sub>2</sub>, (c) ZnIn<sub>2</sub>S<sub>4</sub>, (d) C<sub>0.15</sub>ZIS, (e) C<sub>0.20</sub>ZIS, and (f) C<sub>0.15</sub>ZIS-5C-3M.

**Table S1.** BET surface areas of different samples.

| Photocatalyst                                       | CdS  | MoS <sub>2</sub> | ZnIn <sub>2</sub> S <sub>4</sub> | C <sub>0.15</sub> ZIS | C <sub>0.20</sub> ZIS | C <sub>0.15</sub> ZIS-5C-3M |
|-----------------------------------------------------|------|------------------|----------------------------------|-----------------------|-----------------------|-----------------------------|
| S <sub>BET</sub> (m <sup>2</sup> ·g <sup>-1</sup> ) | 5.39 | 23.78            | 60.94                            | 46.85                 | 42.32                 | 54.64                       |

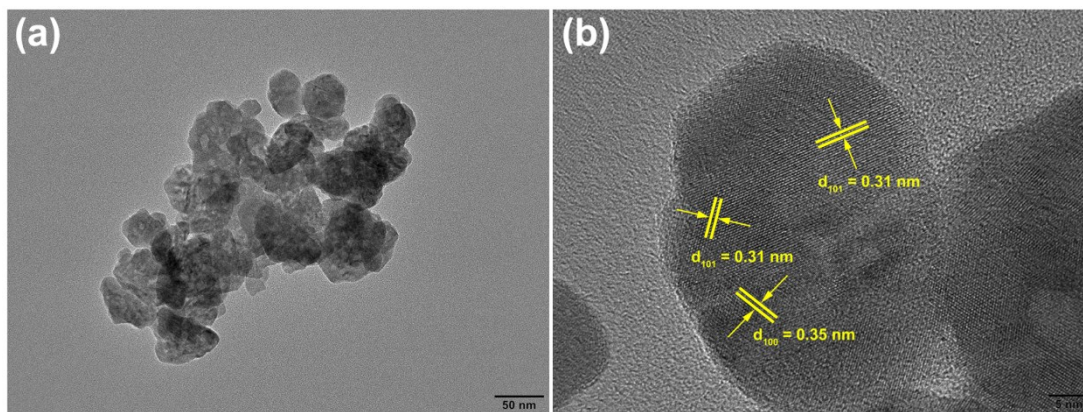

**Fig. S4** (a) TEM and (b) HRTEM images of the CdS nanocrystals prepared without the presence of  $C_{0.15}ZIS$  substrate.

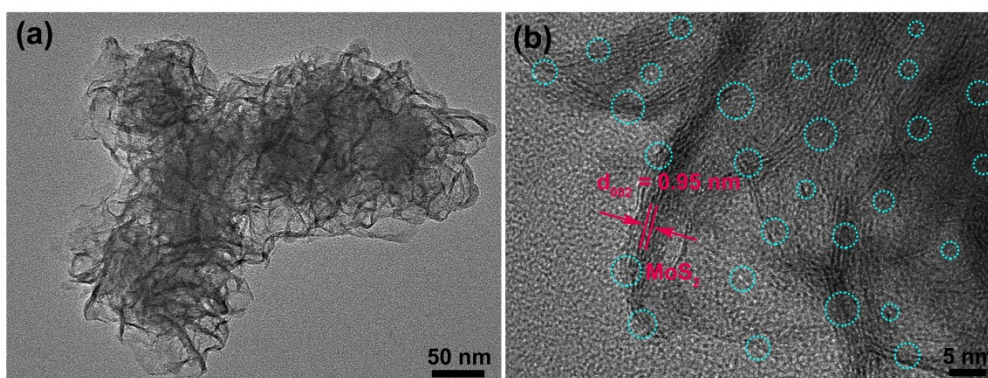

**Fig. S5** (a) TEM and (b) HRTEM images of  $MoS_2$  nanosheets.

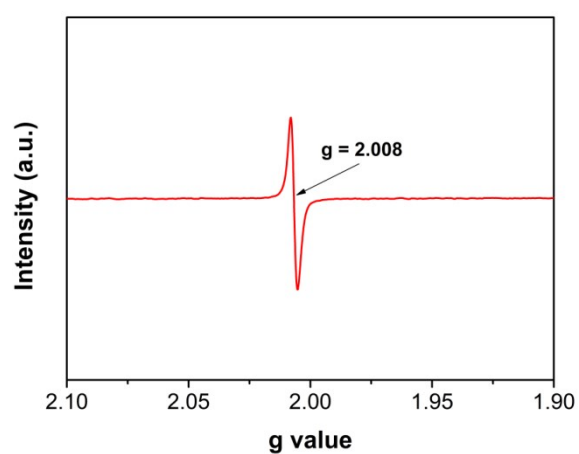

**Fig. S6** EPR spectrum of  $MoS_2$  nanosheets.

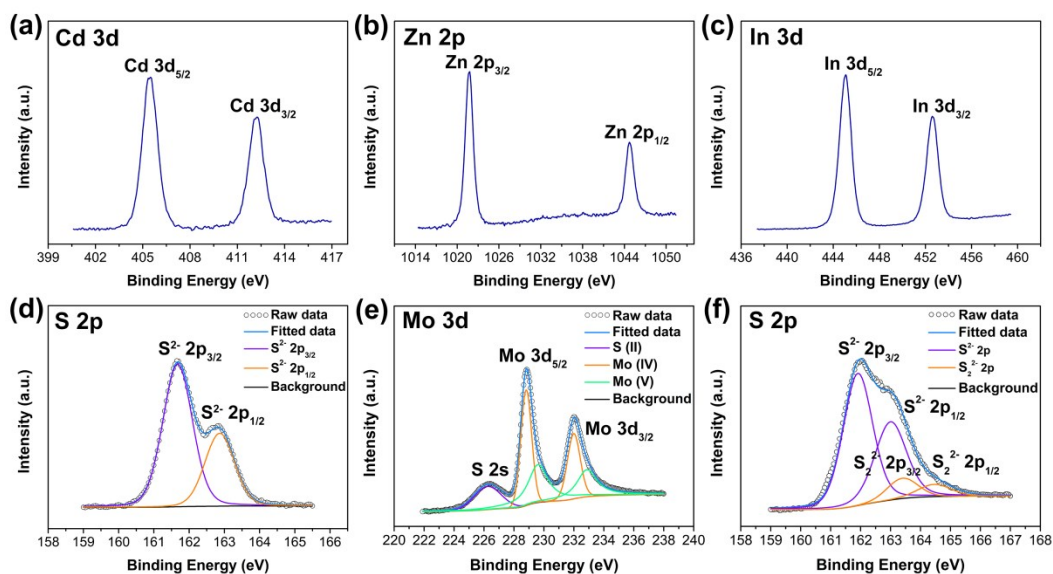

**Fig. S7** (a) Cd 3d, (b) Zn 2p, (c) In 3d, and (d) S 2p XPS spectra of  $C_{0.15}ZIS$  nanosheets. (e) Mo 3d and (f) S 2p XPS spectra of  $MoS_2$  nanosheets.

For  $C_{0.15}ZIS$  nanosheets, the doublet signals of Cd 3d, Zn 2p, and In 3d spectra locating at 405.5-412.2 eV (Fig. S7a), 1021.7-1044.7 eV (Fig. S7b), and 445.1-452.6 eV (Fig. S7c) are associated with the  $Cd^{2+}$ ,  $Zn^{2+}$ ,  $In^{3+}$  valence states, respectively. In the S 2p spectrum (Fig. S7d), the peaks at 161.7 and 162.9 eV could be assigned to the  $S^{2-}$  ions.<sup>4</sup> Regarding to  $MoS_2$  nanosheets, the Mo 3d spectrum consists of two sets of doublet peaks at 228.8-232.0 eV and 229.6-232.9 eV (Fig. S7e), which match well with that of  $Mo^{4+}$  and  $Mo^{5+}$  species,<sup>5,6</sup> respectively. Moreover, the S 2p spectrum exhibits two sets of doublet signals at 161.9-163.0 eV and 163.4-164.5 eV (Fig. S7f), corresponding to the  $S^{2-}$  and  $S_2^{2-}$  ions,<sup>7,8</sup> respectively.

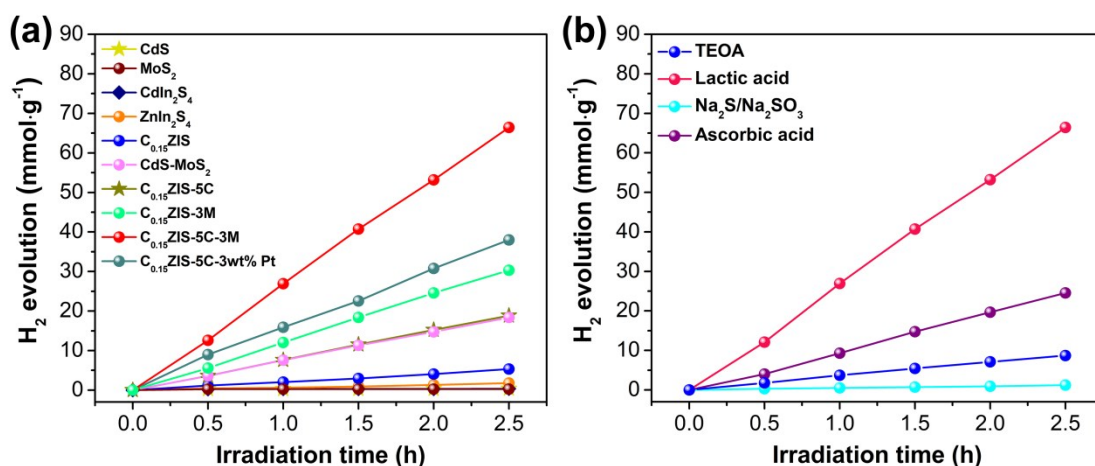

**Fig. S8** (a) Visible-light-induced  $H_2$  formation activities of different samples. (b) The influence of sacrificial agent on the HER activity of  $C_{0.15}ZIS-5C-3M$ .

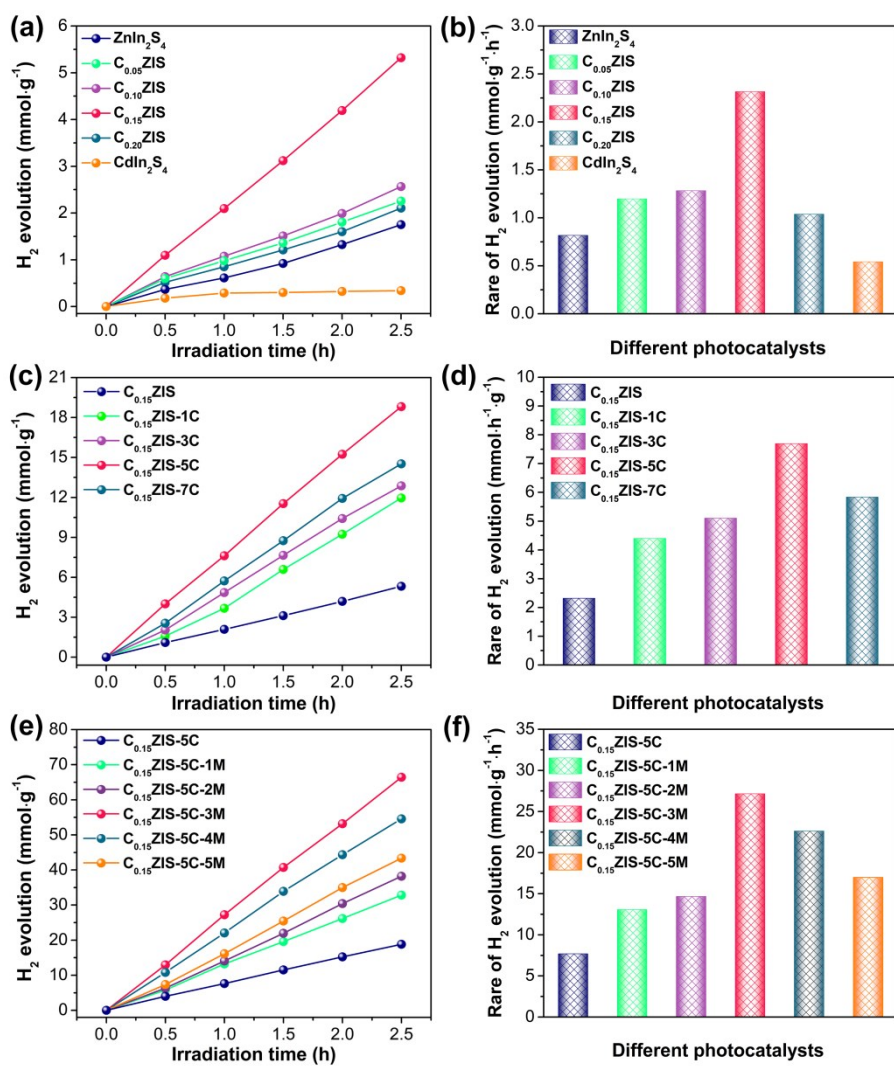

**Fig. S9** Photocatalytic HER activities and corresponding rates different photocatalysts. (a, b) C<sub>x</sub>ZIS (x = 0.05, 0.10, 0.15, and 0.20), x equals to 0 and 1 for ZnIn<sub>2</sub>S<sub>4</sub> and CdIn<sub>2</sub>S<sub>4</sub>, respectively. (c, d) C<sub>0.15</sub>ZIS-yC (y = 0, 1, 3, 5, and 7). (e, f) C<sub>0.15</sub>ZIS-5C-zM (z = 0, 1, 2, 3, 4, and 5).

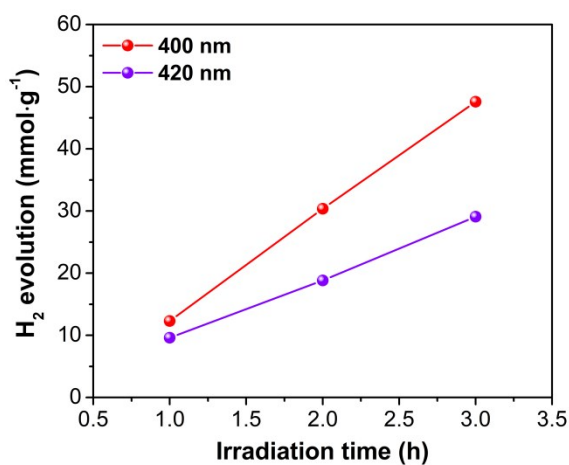

**Fig. S10** H<sub>2</sub> evolution curves of C<sub>0.15</sub>ZIS-5C-3M for calculating the AQY at 400 and 420 nm.

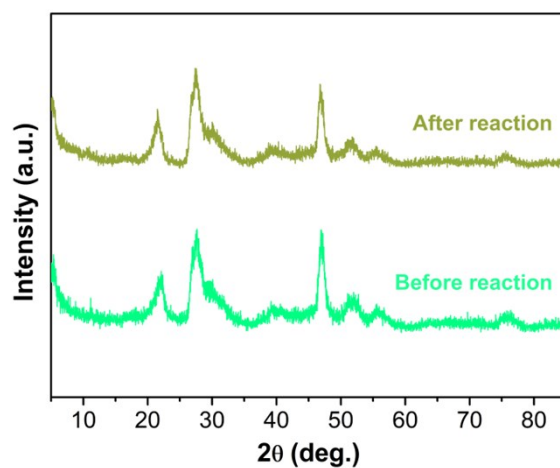

Fig. S11 XRD patterns of the  $C_{0.15}ZIS-5C-3M$  hybrid before and after HER test.

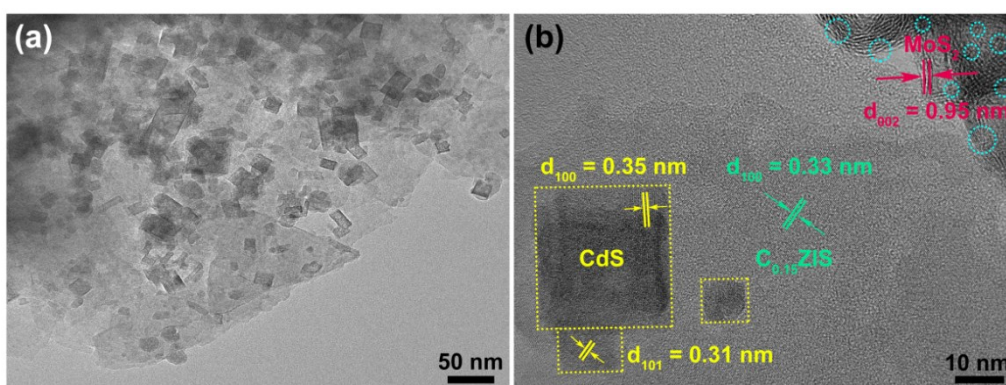

Fig. S12 (a) TEM and (b) HRTEM graphs of the  $C_{0.15}ZIS-5C-3M$  after HER measurement.

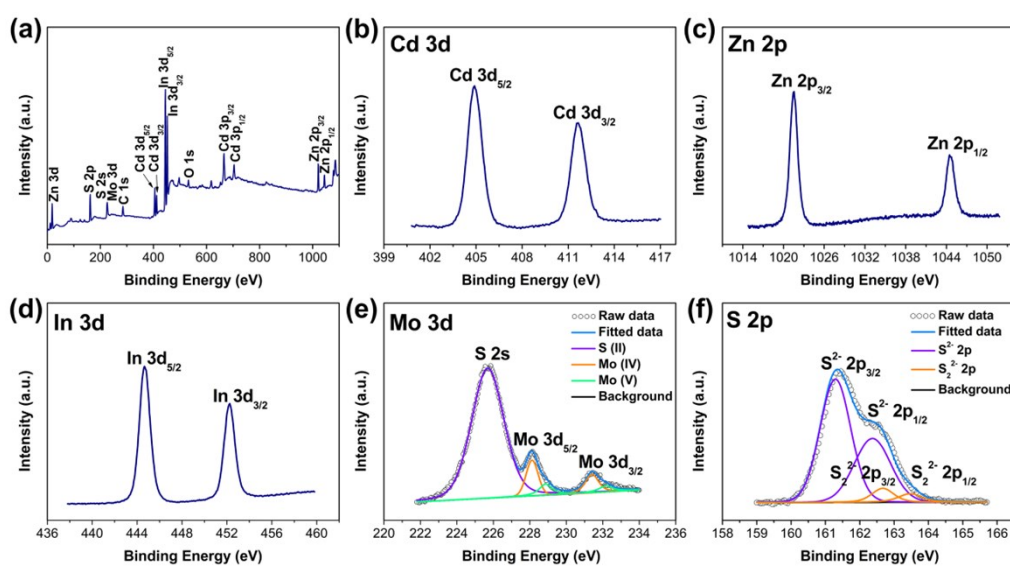

Fig. S13 (a) XPS survey, (b) Cd 3d, (c) Zn 2p, (d) In 3d, (e) Mo 3d, and (f) S 2P spectra of  $C_{0.15}ZIS-5C-10M$  after HER test.

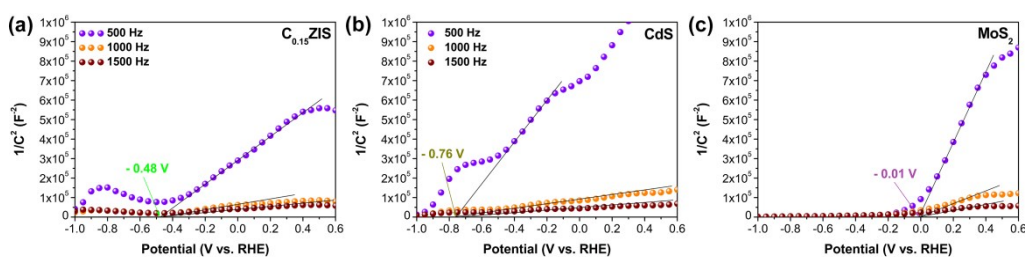

Fig. S14 Mott-Schottky curves of (a)  $C_{0.15}ZIS$ , (b)  $CdS$ , and (c)  $MoS_2$ .

Table S2. Comparison on the photocatalytic HER activities of  $ZnIn_2S_4$ -based composites.

| Photocatalyst                           | Hole scavenger<br>(aqueous solution) | Light source<br>(Xe lamp) | Maximum rate<br>( $mmol \cdot h^{-1} \cdot g^{-1}$ ) | AQE<br>(420 nm)           | Reference |
|-----------------------------------------|--------------------------------------|---------------------------|------------------------------------------------------|---------------------------|-----------|
| $Cd_xZn_{1-x}In_2S_4$ - $CdS$ - $MoS_2$ | Lactic acid                          | $\lambda > 400$ nm        | 27.14                                                | 11.80%<br>19.97% (400 nm) | This work |
| $MoS_2/ZnIn_2S_4$                       | $Na_2S/Na_2SO_3$                     | $\lambda > 420$ nm        | 3.89                                                 | -                         | 9         |
| $MoS_2/ZnIn_2S_4$                       | Lactic acid                          | $\lambda > 420$ nm        | 8.04                                                 | -                         | 10        |
| $MoS_2QDs@ZnIn_2S_4@RGO$                | Lactic acid                          | UV and vis                | 5.791                                                | 54.17%                    | 11        |
| $MoS_2QDs@Vs-MZnIn_2S_4$                | $Na_2S/Na_2SO_3$                     | $\lambda > 420$ nm        | 6.88                                                 | 63.87%                    | 12        |
| $RGO/ZnIn_2S_4$                         | Lactic acid                          | $\lambda > 420$ nm        | 0.81                                                 | -                         | 13        |
| $RGO/ZnIn_2S_4$                         | TEOA                                 | $\lambda > 420$ nm        | 2.64                                                 | 4.4%                      | 14        |
| $ZnIn_2S_4@NH_2-MIL-125(Ti)$            | $Na_2S/Na_2SO_3$                     | $\lambda > 420$ nm        | 2.20                                                 | 4.3%                      | 15        |
| $UiO-66@ZnIn_2S_4$                      | TEOA                                 | $\lambda > 400$ nm        | 3.06                                                 | 9.84%                     | 16        |
| H-doped $ZnIn_2S_4$                     | $Na_2S/Na_2SO_3$                     | $\lambda > 420$ nm        | 2.15                                                 | 13.2%                     | 17        |
| N-doped $ZnIn_2S_4$                     | TEOA                                 | $\lambda > 400$ nm        | 11.08                                                | 13.8%                     | 18        |
| Oxygen-Doped $ZnIn_2S_4$                | $Na_2S/Na_2SO_3$                     | $\lambda > 420$ nm        | 2.12                                                 | -                         | 19        |
| Cubic/Hexagonal $ZnIn_2S_4$             | $Na_2S/Na_2SO_3$                     | $\lambda > 420$ nm        | 3.80                                                 | 18.67%                    | 20        |
| Half-unit-cell $ZnIn_2S_4$              | TEOA                                 | $\lambda > 400$ nm        | 13.47                                                | 53.68% (365 nm)           | 21        |
| $Co_9S_8@ZnIn_2S_4$                     | TEOA                                 | $\lambda > 400$ nm        | 6.25                                                 | -                         | 22        |
| $AgIn_5S_8/ZnIn_2S_4$                   | $Na_2S/Na_2SO_3$                     | $\lambda > 420$ nm        | 0.94                                                 | -                         | 23        |
| Ti (IV)/ $ZnIn_2S_4$                    | $Na_2S/Na_2SO_3$                     | $\lambda > 420$ nm        | 3.68                                                 | -                         | 24        |
| $Ti_3C_2T_x$ MXene/ $ZnIn_2S_4$         | TEOA                                 | $\lambda > 420$ nm        | 3.47                                                 | 11.14%                    | 25        |
| $NiS/ZnIn_2S_4$                         | Lactic acid                          | $\lambda > 420$ nm        | 3.33                                                 | 32%                       | 26        |
| $g-C_3N_4/ZnIn_2S_4$                    | TEOA                                 | $\lambda > 420$ nm        | 4.85                                                 | -                         | 27        |
| $MoC-QDs/C/ZnIn_2S_4$                   | lactic acid                          | $\lambda > 400$ nm        | 1.13                                                 | -                         | 28        |
| $ZnIn_2S_4/pCN$                         | TEOA                                 | $\lambda > 420$ nm        | 0.81                                                 | -                         | 29        |
| $MoS_2/Cu-ZnIn_2S_4$                    | Ascorbic acid                        | $\lambda > 420$ nm        | 5.46                                                 | 13.6%                     | 30        |
| $ZnIn_2S_4/In(OH)_3$ -%Pt               | TEOA                                 | $\lambda > 420$ nm        | 1.47                                                 | 38.3%                     | 31        |
| $ZnIn_2S_4/MoSe_2$                      | $Na_2S/Na_2SO_3$                     | $\lambda > 420$ nm        | 2.22                                                 | 21.39%                    | 32        |
| $Mo_2C/ZnIn_2S_4$                       | TEOA                                 | $\lambda > 400$ nm        | 22.11                                                | 71.6%                     | 33        |

## References:

- 1 Z. P. Yan, X. X. Yu, A. L. Han, P. Xu and P. W. Du, *J. Phys. Chem. C*, 2014, **118**, 22896.
- 2 Y. Z. Wang, D. Chen, L. S. Qin, J. H. Liang and Y. X. Huang, *Phys. Chem. Chem. Phys.*, 2019, **21**, 25484.
- 3 M. Zhou, S. B. Wang, P. J. Yang, Z. S. Luo, R. S. Yuan, A. M. Asiri, M. Wakeel and X. C. Wang, *Chem. Eur. J.*, 2018, **24**, 18529.
- 4 S. D. Guan, X. L. Fu, Y. Zhang and Z. J. Peng, *Chem. Sci.*, 2018, **9**, 1574.
- 5 K. Q. Lu, M. Y. Qi, Z. R. Tang and Y. J. Xu, *Langmuir*, 2019, **35**, 11056.
- 6 Y. H. Chang, R. D. Nikam, C. T. Lin, J. K. Hang, C. C. Tseng, C. L. Hsu, C. C. Cheng, C. Y. Su, L. J. Li and D. H. C. Chua, *ACS Appl. Mater. Interfaces*, 2014, **6**, 17679.
- 7 L. Ye, J. L. Fu, Z. Xu, R. S. Yuan and Z. H. Li, *ACS Appl. Mater. Interfaces*, 2014, **6**, 3483.
- 8 D. Merki, S. Fierro, H. Vrubel and X. L. Hu, *Chem. Sci.*, 2011, **2**, 1262.
- 9 Z. Z. Zhang, L. Huang, J. J. Zhang, F. J. Wang, Y. Y. Xie, X. T. Shang, Y. Y. Gu, H. B. Zhao and X. X. Wang, *Appl. Catal. B: Environ.*, 2018, **233**, 112.
- 10 G. P. Chen, N. Ding, F. Li, Y. Z. Fan, Y. H. Luo, D. M. Li and Q. B. Meng, *Appl. Catal. B: Environ.*, 2014, **161**, 614.
- 11 S. Q. Zhang, L. L. Wang, C. B. Liu, J. M. Luo, J. Crittenden, X. Liu, T. Cai, J. L. Yuan, Y. Pei and Y. T. Liu, *Water Res.*, 2017, **121**, 11.
- 12 S. Q. Zhang, X. Liu, C. B. Liu, S. Luo, L. L. Wang, T. Cai, Y. X. Zeng, J. L. Yuan, W. Y. Dong, Y. Pei and Y. T. Liu, *ACS Nano*, 2018, **12**, 751.
- 13 L. Ye, J. L. Fu, Z. Xu, R. S. Yuan and Z. H. Li, *ACS Appl. Mater. Interfaces*, 2014, **6**, 3483.
- 14 Y. Xia, Q. Li, K. Lv, D. G. Tang and M. Li, *Appl. Catal. B: Environ.*, 2017, **206**, 344.
- 15 H. Liu, J. Zhang and D. Ao, *Appl. Catal. B: Environ.*, 2018, **221**, 433.
- 16 X. X. Peng, L. Ye, Y. C. Ding, L. C. Yi, C. Zhang and Z. H. Wen, *Appl. Catal. B: Environ.*, 2020, **260**, 118152.
- 17 Y. W. Zhu, L. L. Wang, Y. T. Liu, L. H. Shao and X. N. Xia, *Appl. Catal. B: Environ.*, 2019, **241**, 483.
- 18 C. Du, B. Yan, Z. Y. Lin and G. W. Yang, *J. Mater. Chem. A*, 2020, **8**, 207.



- 19 W. L. Yang, L. Zhang, J. F. Xie, X. D. Zhang, Q. H. Liu, T. Yao, S. Q. Wei, Q. Zhang and Y. Xie, *Angew. Chem. Int. Ed.*, 2016, **55**, 6716.
- 20 J. G. Wang, Y. J. Chen, W. Zhou, G. H. Tian, Y. T. Xiao, H. Y. Fu and H. G. Fu, *J. Mater. Chem. A*, 2017, **5**, 8451.
- 21 C. Du, Q. Zhang, Z. Y. Lin, B. Yan, C. X. Xia and G. W. Yang, *Appl. Catal. B: Environ.*, 2019, **248**, 193-201.
- 22 S. B. Wang, B. Y. Guan, X. Wang and X. W. D. Lou, *J. Am. Chem. Soc.*, 2018, **140**, 15145.
- 23 Z. J. Guan, Z. Q. Xu, Q. Y. Li, P. Wang, G. Q. Li and J. J. Yang, *Appl. Catal. B: Environ.*, 2018, **227**, 512.
- 24 G. Ma, C. Q. Shang, M. L. Jin, L. L. Shui, Q. G. Meng, Y. G. Zhang, Z. Zhang, H. Liao, M. Li, Z. H. Chen, M. Z. Yuan, X. Wang, C. Y. Wang and G. F. Zhou, *J. Mater. Chem. C*, 2020, **8**, 2693.
- 25 G. C. Zuo, Y. T. Wang, W. L. Teo, A. Xie, Y. Guo, Y. X. Dai, W. Q. Zhou, D. Jana, Q. M. Xian, W. Dong and Y. L. Zhao, *Angew. Chem. Int. Ed.*, 2020, **59**, 11287.
- 26 A. H. Yan, X. W. Shi, F. Huang, M. Fujitsuk and T. Majim, *Appl. Catal. B: Environ.*, 2019, **250**, 163.
- 27 Z. Q. Gao, K. Y. Chen, L. Wang, B. Bai, H. Liu and Q. Z. Wang, *Appl. Catal. B: Environ.*, 2020, **268**, 118462.
- 28 F. Gao, Y. Zhao, L. L. Zhang, B. Wang, Y. Z. Wang, X. Y. Huang, K. Q. Wang, W. H. Feng and P. Liu, *J. Mater. Chem. A*, 2018, **6**, 18979.
- 29 H. C. Yang, R. Y. Cao, P. X. Sun, J. M. Yin, S. W. Zhang and X. J. Xu, *Appl. Catal. B: Environ.*, 2019, **256**, 117862.
- 30 Y. J. Yuan, D. Q. Chen, J. S. Zhong, L. X. Yang, J. J. Wang, M. J. Liu, W. G. Tu, Z. T. Yu and Z. G. Zou, *J. Mater. Chem. A*, 2017, **5**, 15771.
- 31 Y. X. Li, Y. L. Hou, Q. Y. Fu, S. Q. Peng and Y. H. Hu, *Appl. Catal. B: Environ.*, 2017, **206**, 726.
- 32 D. Q. Zeng, L. Xiao, W. J. Ong, P. Y. Wu, H. F. Zheng, Y. Z. Chen and D. L. Peng, *ChemSusChem*, 2017, **10**, 4624.
- 33 C. Du, B. Yan and G. W. Yang, *Nano Energy*, 2020, **76**, 105031.
